# Supplementary material
Source: publisher site journal article supplement (https://www.dovepress.com/article/605247)
Supplement: Supplementary file 1 [file %255B605247%255D%20Supplementary%20Material.docx]

| **Supplementary information** |
| --- |
| Acupuncture for Postherpetic Neuralgia: An Evidence Mapping |

**Table of Contents**

[Acupuncture for Postherpetic Neuralgia: An Evidence Mapping 1](#_Toc205673035)

[Table of Contents 2](#_Toc205673036)

[Supplementary Material 1: Search Strategy 3](#_Toc205673037)

[Pubmed 3](#_Toc205673038)

[Web of Science 4](#_Toc205673039)

[Embase 5](#_Toc205673040)

[CNKI 6](#_Toc205673041)

[VIP 7](#_Toc205673042)

[WanFang 8](#_Toc205673043)

[Supplementary Table 1: List of studies excluded at text screening stage 10](#_Toc205673044)

[Supplementary Table 2: Amstar-2 assessment of included SRs 24](#_Toc205673045)

# Supplementary Material 1: Search Strategy

### Pubmed

(

(Neuralgia, Postherpetic [MeSH Terms])

OR (

Postherpetic Neuralgia [Title/Abstract] OR Post-herpetic Neuralgia [Title/Abstract] OR Neuralgia Postherpetic [Title/Abstract] OR PHN [Title/Abstract] OR Herpes Zoster Neuralgia [Title/Abstract]

)

)

AND

(

(Acupuncture Therapy [MeSH Terms])

OR Acupuncture Treatment [Title/Abstract] OR Acupuncture Treatments [Title/Abstract] OR Treatment, Acupuncture [Title/Abstract] OR Therapy, Acupuncture [Title/Abstract]

OR

(Acupuncture Analgesia [MeSH Terms])

OR Analgesia, Acupuncture [Title/Abstract] OR Acupuncture Anesthesia [Title/Abstract] OR Anesthesia, Acupuncture [Title/Abstract]

OR

(Acupuncture, Ear [MeSH Terms])

OR Acupunctures, Ear [Title/Abstract] OR Ear Acupunctures [Title/Abstract] OR Acupuncture, Auricular [Title/Abstract] OR Acupunctures, Auricular [Title/Abstract] OR Auricular Acupunctures [Title/Abstract] OR Auricular Acupuncture [Title/Abstract] OR Ear Acupuncture [Title/Abstract]

OR

(Electroacupuncture [MeSH Terms])

OR

(Moxibustion [MeSH Terms])

OR

(Acupuncture [MeSH Terms])

OR

firing needle [Title/Abstract] OR fire needle [Title/Abstract] OR filiform fire needle [Title/Abstract] OR huo zhen [Title/Abstract] OR plum needle [Title/Abstract] OR plum-blossom needle [Title/Abstract] OR mei hua zhen [Title/Abstract] OR bloodletting [Title/Abstract] OR float needle [Title/Abstract] OR fu zhen [Title/Abstract] OR fu needle [Title/Abstract] OR cupping [Title/Abstract] OR pricking [Title/Abstract] OR warm acupuncture [Title/Abstract] OR manual acupuncture [Title/Abstract]

)

AND

((systematic*[tiab] AND (bibliographic*[TIAB] OR literature[tiab] OR review[tiab] OR reviewed[tiab] OR reviews[tiab])) OR (comprehensive*[TIAB] AND (bibliographic*[TIAB] OR literature[tiab])) OR "cochrane database syst rev"[Journal] OR "Evidence report/technology assessment (Summary)"[journal] OR "Evidence report/technology assessment"[journal] OR "integrative literature review"[tiab] OR "integrative research review"[tiab] OR "integrative review"[tiab] OR "research synthesis"[tiab] OR "research integration"[tiab] OR cinahl[tiab] OR embase[tiab] OR medline[tiab] OR psyclit[tiab] OR (psycinfo[tiab] NOT "psycinfo database"[tiab]) OR pubmed[tiab] OR scopus[tiab] OR "web of science"[tiab] OR "data synthesis"[tiab] OR meta-analys*[tiab] OR meta-analyz*[tiab] OR meta-analyt*[tiab] OR metaanalys*[tiab] OR metaanalyz*[tiab] OR metaanalyt*[tiab] OR "meta-analysis as topic"[MeSH:noexp] OR Meta-Analysis[ptyp] OR ((review[tiab] AND (rationale[tiab] OR evidence[tiab])) AND review[pt]))

**Web of Science**

(

TS = (Acupuncture OR Acupuncture Therapy OR Acupuncture Treatment OR Acupuncture Treatments OR Treatment, Acupuncture OR Therapy, Acupuncture)

OR TS = (Acupuncture Analgesia OR Analgesia, Acupuncture OR Acupuncture Anesthesia OR Anesthesia, Acupuncture)

OR TS = (Acupuncture, Ear OR Acupunctures, Ear OR Ear Acupunctures OR Acupuncture, Auricular OR Acupunctures, Auricular OR Auricular Acupunctures OR Auricular Acupuncture OR Ear Acupuncture)

OR TS = (Electroacupuncture OR Moxibustion OR Acupuncture OR firing needle OR fire needle OR filiform fire needle OR huo zhen OR plum needle OR plum-blossom needle OR mei hua zhen OR bloodletting OR float needle OR fu zhen OR fu needle OR cupping OR pricking OR warm acupuncture OR manual acupuncture)

)

AND (

TS = (Neuralgia, Postherpetic OR

Postherpetic Neuralgia OR

Post-herpetic Neuralgia OR

Neuralgia Postherpetic OR

PHN OR

Herpes Zoster Neuralgia)

)

AND

(

TS =(Systematic review OR Meta Analysis)

)

**Embase**

(

'Neuralgia, Postherpetic'/exp

OR

'neuralgia, postherpetic' OR 'neuralgia, postherpetic':ti,ab OR 'postherpetic neuralgia':ti,ab OR 'post-herpetic neuralgia':ti,ab OR 'neuralgia postherpetic':ti,ab OR 'phn':ti,ab OR 'herpes zoster neuralgia':ti,ab)

(

'Neuralgia, Postherpetic'/exp

OR

'Neuralgia, Postherpetic':ti,ab OR

'Postherpetic Neuralgia':ti,ab OR

'Post-herpetic Neuralgia':ti,ab OR

'Neuralgia Postherpetic':ti,ab OR

'PHN':ti,ab OR

'Herpes Zoster Neuralgia':ti,ab

)

AND

(

'Acupunture therapy'/exp

OR

'Acupuncture Treatment':ti,ab

OR 'Acupuncture Treatments':ti,ab

OR 'Treatment, Acupuncture':ti,ab

OR 'Therapy, Acupuncture':ti,ab

OR 'Acupuncture Analgesia'/exp

OR

'Analgesia, Acupuncture':ti,ab

OR 'Acupuncture Anesthesia':ti,ab

OR 'Anesthesia, Acupuncture':ti,ab

OR 'Acupuncture, Ear'/exp

OR

'Acupunctures, Ear':ti,ab

OR 'Ear Acupunctures':ti,ab

OR 'Acupuncture, Auricular':ti,ab

OR 'Acupunctures, Auricular':ti,ab

OR 'Auricular Acupunctures':ti,ab

OR 'Auricular Acupuncture':ti,ab

OR 'Ear Acupuncture':ti,ab

OR 'Electroacupuncture'/exp

OR 'Moxibustion'/exp

OR 'Acupuncture'/exp

OR 'blood letting'/exp

OR

'firing needle':ti,ab

OR 'fire needle':ti,ab

OR 'filiform fire needle':ti,ab

OR 'huo zhen':ti,ab

OR 'plum needle':ti,ab

OR 'plum-blossom needle':ti,ab

OR 'mei hua zhen':ti,ab

OR 'bloodletting':ti,ab

OR 'float needle':ti,ab

OR 'fu zhen':ti,ab

OR 'fu needle':ti,ab

OR 'cupping':ti,ab

OR 'pricking':ti,ab

OR 'warm acupuncture':ti,ab

OR 'manual acupuncture':ti,ab

)

AND

('meta analysis'/exp OR 'meta analysis' OR 'systematic review'/exp OR 'systematic review' OR 'meta analysis':ab,ti OR 'systematic review':ab,ti)

**CNKI**

(SU%='针灸' or TKA%='针灸' OR SU%='针刺' or TKA%='针刺' OR SU%='温针' or TKA%='温针' OR SU%='温针灸' or TKA%='温针灸' OR SU%='针' or TKA%='针' OR SU%='手针' or TKA%='手针' OR SU%='体针' or TKA%='体针' OR SU%='毫针' or TKA%='毫针' OR SU%='浮针' or TKA%='浮针' OR SU%='头针' or TKA%='头针' OR SU%='耳针' or TKA%='耳针' OR SU%='面针' or TKA%='面针' OR SU%='腹针' or TKA%='腹针' OR SU%='腕踝针' or TKA%='腕踝针' OR SU%='皮下针' or TKA%='皮下针' OR SU%='三棱针' or TKA%='三棱针' OR SU%='皮肤针' or TKA%='皮肤针' OR SU%='梅花针' or TKA%='梅花针' OR SU%='七星针' or TKA%='七星针' OR SU%='皮内针' or TKA%='皮内针' OR SU%='揿针' or TKA%='揿针' OR SU%='埋针' or TKA%='埋针' OR SU%='电针' or TKA%='电针' OR SU%='火针' or TKA%='火针' OR SU%='芒'针 or TKA%='芒针' OR SU%='透刺' or TKA%='透刺' OR SU%='夹脊穴' or TKA%='夹脊穴' OR SU%='太乙神针' or TKA%='太乙神针' OR SU%='雷火神针' or TKA%='雷火神针' OR SU%='毫火针' or TKA%='毫火针' OR SU%='刺络' or TKA%='刺络' OR SU%='放血' or TKA%='放血' OR SU%='罐' or TKA%='罐')

AND

SU(SU%='带状疱疹神经痛' or TKA%='带状疱疹神经痛' OR SU%='带状疱疹后神经痛' or TKA%='带状疱疹后神经痛' OR SU%='PHN' or TKA%='PHN' OR SU%='PHN' or TKA%='PHN' OR SU%='带状疱疹后遗神经痛' or TKA%='带状疱疹后遗神经痛')

AND

(SU%='系统评价' or TKA%='系统评价' OR SU%='meta分析' or TKA%='meta分析' OR SU%='荟萃分析' or TKA%='荟萃分析')

**VIP**

(

M=(针灸)

or M=(针刺)

or M=(温针)

or M=(温针灸)

or M=(针)

or M=(手针)

or M=(体针)

or M=(毫针)

or M=(浮针)

or M=(头针)

or M=(耳针)

or M=(面针)

or M=(腹针)

or M=(腕踝针)

or M=(皮下针)

or M=(三棱针)

or M=(皮肤针)

or M=(梅花针)

or M=(七星针)

or M=(皮内针)

or M=(揿针)

or M=(埋针)

or M=(电针)

or M=(火针)

or M=(芒针)

or M=(透刺)

or M=(夹脊穴)

or M=(太乙神针)

or M=(雷火神针)

or M=(毫火针)

or M=(刺络)

or M=(放血)

or M=(罐)

)

and (

M=(带状疱疹后遗神经痛)

or M=(带状疱疹后神经痛)

or M=(带状疱疹神经痛)

or M=(PHN)

)

and (

M=(系统评价)

or M=(meta分析)

or M=(荟萃分析)

)

**WanFang**

(

主题:(针灸)

or 主题:(针刺)

or 主题:(温针)

or 主题:(温针灸)

or 主题:(针)

or 主题:(手针)

or 主题:(体针)

or 主题:(毫针)

or 主题:(浮针)

or 主题:(头针)

or 主题:(耳针)

or 主题:(面针)

or 主题:(腹针)

or 主题:(腕踝针)

or 主题:(皮下针)

or 主题:(三棱针)

or 主题:(皮肤针)

or 主题:(梅花针)

or 主题:(七星针)

or 主题:(皮内针)

or 主题:(揿针)

or 主题:(埋针)

or 主题:(电针)

or 主题:(火针)

or 主题:(芒针)

or 主题:(透刺)

or 主题:(夹脊穴)

or 主题:(太乙神针)

or 主题:(雷火神针)

or 主题:(毫火针)

or 主题:(刺络)

or 主题:(放血)

or 主题:(罐)

)

and (

主题:(带状疱疹后遗神经痛)

or 主题:(带状疱疹后神经痛)

or 主题:(带状疱疹神经痛)

or 主题:(PHN)

)

and (

主题:(系统评价)

or 主题:(meta分析)

or 主题:(荟萃分析)

)

**Supplementary Table 1: List of studies excluded at text screening stage**

| **Excluded reasons** | **Title** | **Year** | **Author** |
| --- | --- | --- | --- |
| Protocol | Acupuncture for neuropathic pain in adults | 2016 | Ju ZY, Wang K, Cui HS, Yao Y, Liu SM, Zhou J, et al. |
| Protocol | Acupuncture for postherpetic neuralgia | 2014 | Wang P, Zhao J, Wu T |
| Protocol | Acupuncture for postherpetic neuralgia: a systematic review protocol | 2014 | Li W, Peng W, Zhou J, Liu Z |
| Protocol | Acupuncture therapies for postherpetic neuralgia: a protocol for a systematic review and Bayesian network meta-analysis | 2022 | Bian Z, Yu J, Tu M, Liao B, Huang J, Izumoji G, et al. |  |
| Protocol | Acupuncture therapy for treating postherpetic neuralgia: A protocol for an overview of systematic reviews and meta-analysis | 2020 | Yu J, Tu M, Shi Y, Liu Y, He X, Qiu F, et al. |
| Protocol | An update of fire needle acupuncture for acute herpes zoster and prevention of postherpetic neuralgia in adults: A protocol for systematic review and meta-analysis | 2021 | Wang J, Wang X, Xia H, Zhang N, Lin S, Zeng J, et al. |
| Protocol | Comparative effectiveness of external therapies of traditional Chinese medicine and surgical treatments in pain management of postherpetic neuralgia: A protocol for a systematic review and network meta-analysis | 2022 | Pan Z, Huang S, Ma T, Yuan R, Wang M, Luo R, et al. |
| Protocol | Effectiveness of acupuncture therapy for postherpetic neuralgia: an umbrella review protocol | 2021 | Zhao Y, Ling DY, Zhang J, Wu Q, Zhang ZW, Wang ZY |
| Protocol | Efficacy and safety of acupuncture and moxibustion for herpes zoster: A protocol for systematic review and network meta analysis | 2020 | Zhang N, Liu K, She Y, Zhao W, Zeng J, Lin G |
| Protocol | Efficacy and safety of acupuncture in the treatment of postherpetic neuralgia: A protocol for systematic review and network meta-analysis | 2021 | Zhao J, Zhou Z, He X, Yuan Y, Wang D |
| **Excluded reasons** | **Title** | **Year** | **Author** |
| Protocol | Efficacy and safety of bloodletting for herpes zoster A protocol for systematic review and meta-analysis | 2021 | Wang X, Huang S, Shao G, Zhang J, Wang S, Lv Y, et al. |
| Protocol | Efficacy and safety of fire needle combined with cupping for acute herpes zoster and postherpetic neuralgia: A protocol for systemic review and meta-analysis | 2022 | Huang S, Xu Y, Pan Z, Li Z, Luo R, Yu M, et al. |
| Protocol | Efficacy and safety of fire needle vs conventional acupuncture in the treatment of postherpetic neuralgia: A protocol for systematic review and meta analysis | 2020 | Lu L, Xiong J, Chen Z, Zhou X, Chen J, Tang G, et al. |
| Protocol | Efficacy of thermotherapy for herpes zoster and postherpetic neuralgia: A protocol for systemic review and meta-analysis | 2021 | Li Z, She Y, Luo Z, Liu Z, Pei W, Zeng J, et al. |
| Protocol | Fire Needling Acupuncture for Adult Patients with Acute Herpes Zoster: Protocol of a Systematic Review and Meta-Analysis | 2022 | Liu L, Chen Q, Yang J, Gang W, Zhao L, Lyu T, et al. |
| Protocol | Ju Re Ba Du therapy for Postherpetic neuralgia: A protocol for systematic review and meta-analysis | 2020 | Huang S, Pan Z, Li Z, Zhu X, Ma T, Wu J |
| Protocol | Oral herbal medicine for treatment of postherpetic neuralgia A protocol for systematic review and meta-analysis | 2022 | Jeon H, Lee S, Kim SA, Lee U, Lee S |
| Protocol | Should we prescribe anticonvulsants for acute herpes zoster neuralgia and to prevent postherpetic neuralgia? A protocol for meta-analysis and benefit-risk assessment | 2021 | Lu Y, Liu K, Liang Y, Zhang X, Liu Y, Huang F, et al. |
| Not Acupuncture | A systematic literature review to assess the burden of herpes zoster disease in China | 2021 | Yin D, Van Oorschot D, Jiang N, Marijam A, Saha D, Wu Z, et al. |
| **Excluded reasons** | **Title** | **Year** | **Author** |
| Not Acupuncture | Acupoint herbal patching for postherpetic neuralgia: A systematic review and meta-analysis | 2024 | Pu B, Lu X, Yu P, Wang C, Li J, Yang D, et al. |
| Not Acupuncture | Analgesic therapy in postherpetic neuralgia: A quantitative systematic review | 2005 | Hempenstall K, Nurmikko TJ, Johnson RW, A'Hern RP, Rice ASC |
| Not Acupuncture | B12 as a treatment for peripheral neuropathic pain: A systematic review | 2020 | Julian T, Syeed R, Glascow N, Angelopoulou E, Zis P |
| Not Acupuncture | Botulinum Toxin Treatment of Neuropathic Pain | 2016 | Mittal SO, Safarpour D, Jabbari B |
| Not Acupuncture | Can medical herbs stimulate regeneration or neuroprotection and treat neuropathic pain in chemotherapy-induced peripheral neuropathy? | 2013 | Schröder S, Beckmann K, Franconi G, Meyer-Hamme G, Friedemann T, Greten HJ, et al. |
| Not Acupuncture | Chronic pain, its management and psychological issues: A review | 2015 | Jena M, Mishra S, Pradhan S, Jena S, Mishra SS |
| Not Acupuncture | Complementary therapies for neuropathic and neuralgic pain - Systematic review | 2008 | Pittler MH, Ernst E |
| Not Acupuncture | Diabetic Peripheral Neuropathy and Interventional Procedures | 2023 | Moon JY |
| Not Acupuncture | Efficacy and Safety of Mecobalamin on Peripheral Neuropathy: A Systematic Review and Meta-Analysis of Randomized Controlled Trials | 2020 | Sawangjit R, Thongphui S, Chaichompu W, Phumart P |
| Not Acupuncture | Evidence-based pain management and palliative care in issue two for 2009 of the cochrane library | 2009 | Wiffen PJ |
| Not Acupuncture | Fibromyalgia treatment update | 2007 | Rooks DS |
| **Excluded reasons** | **Title** | **Year** | **Author** |
| Not Acupuncture | Integrative approach to the treatment of postherpetic neuralgia: a case series | 1999 | Hui F, Cheng A, Chiu M, Vayda E |
| Not Acupuncture | Neuropathic Corneal Pain | 2017 | Dieckmann G, Goyal S, Hamrah P |
| Not Acupuncture | NMDA Receptor Antagonists, Gabapentinoids, α-2 Agonists, and Dexamethasone and Other Non-Opioid Adjuvants: Do They Have a Role in Plastic Surgery? | 2014 | Low YH, Gan TJ |
| Not Acupuncture | Non-pharmacological management of neuropathic pain in older adults: a systematic review | 2024 | Holmes A, Chang Y-P |
| Not Acupuncture | PEER systematic review of randomized controlled trials Management of chronic neuropathic pain in primary care | 2021 | Falk J, Thomas B, Kirkwood J, Korownyk CS, Lindblad AJ, Ton J, et al. |
| Not Acupuncture | Pharmacological Methods of Pain Management: Narrative Review of Medication Used | 2023 | Alorfi NM |
| Not Acupuncture | Post herpetic neuralgia | 2011 | Philip A, Thakur R |
| Not Acupuncture | Post-herpetic neuralgia | 2012 | Tontodonati M, Ursini T, Polilli E, Vadini F, Di Masi F, Volpone D, et al. |
| Not Acupuncture | Postherpetic neuralgia: New hopes in prevention with adult vaccination and in treatment with a concentrated capsaicin patch | 2012 | Gawecka E, Viken O |
| Not Acupuncture | Postherpetic neuralgia: Review of treatment modalities | 2000 | Chan PSL |
| Not Acupuncture | Practice parameter: treatment of postherpetic neuralgia: an evidence-based report of the Quality Standards Subcommittee of the American Academy of Neurology | 2004 | Dubinsky RM, Kabbani H, El-Chami Z, Boutwell C, Ali H |
| **Excluded reasons** | **Title** | **Year** | **Author** |
| Not Acupuncture | The management of established postherpetic neuralgia: A comparison of the quality and content of traditional vs. systematic reviews | 1998 | Ladhani S, Williams HC |
| Not Acupuncture | Traditional Chinese Medicine for HIV-Associated Acute Herpes Zoster: A Systematic Review and Meta-Analysis of Randomized Trials | 2022 | Jiang Y, Zheng R-X, Yu Z-Y, Zhang X-W, Li J, Lan H-D, et al. |
| Not Acupuncture | Treating neuropathic pain and comorbid affective disorders: Preclinical and clinical evidence | 2024 | Coelho DRA, Gersten M, Jimenez AS, Fregni F, Cassano P, Vieira WF |
| Not Acupuncture | Treatment of postherpetic neuralgia: A systematic review of the literature | 2002 | Alper BS, Lewis PR |
| Not Acupuncture | Treatments for postherpetic neuralgia - A systematic review of randomized controlled trials | 1996 | Volmink J, Lancaster T, Gray S, Silagy C |
| Not Acupuncture | DSA-Guided Pulsed Radiofrequency of Dorsal Root Ganglion Combined with Botulinum Toxin Type A Intradermal Injection for Zoster-Associated Pain | 2023 | Zou TH |
| Not Acupuncture | The Evaluation of Effect and Benefit in Herpes Zoster Clinical Pathway in Traditional Chinese Medicine | 2011 | Zhu HT |
| Not Acupuncture | Current Status and Literature Review of Traditional Chinese Medicine Treatment for Herpes Zoster and Evaluation of Therapeutic Effect Using Fire Needling as an Intervention | 2019 | Zhao NQ |
| Not Acupuncture | Systematic Evaluation of Acupoint Injection in Treatment of Herpes Zosterand Postherpetic Neuralgia | 2021 | Zhang JJ |
| Not Acupuncture | Clinical Trial Design for the Prevention of Chronic Pain — IMMPACT Recommendations | 2016 | Gewandter JS, Cheng WR |
| **Excluded reasons** | **Title** | **Year** | **Author** |
| Not Acupuncture | Using Heat Induced Fever Therapy in the Treatment of Stagnated Heat of Liver Channel Herpes Zoster for 30 Cases | 2017 | Zhang XY, Rong LY |
| Not Acupuncture | The modeling of zebrafish endotoxic inflammation and use of it as a screening method to assess anti-endotoxic properties of the active component of Traditional Chinese Medicine | 2013 | Yang LL |
| Not Acupuncture | Effect of the addition of Tao Hong Si Wu Tang Combined with compound essential oil on postherpetic neuralgia and serum IL-6 le | 2023 | Wang YH |
| Not Acupuncture | 析Meta-analysis of early adjuvant treatment to preventpostherpetic neuralgia | 2021 | Wang FC |
| Not Acupuncture | Clinical Observation of Pulsed Radiofrequency in the Treatment of Cervical Postherpetic Neuralgia | 2020 | Li SN, Jin J, Wang M, Wu ZY, Shen W, Liang D, et al. |
| Not Acupuncture | Intervertebral foramen injection of ozone treatsneuropathic pain and performs synergistic analgesiceffect with gabapentin | 2017 | Luo WJ |
| Not Acupuncture | From the Perspective of "Evidence-Based and Value-Based Healthcare": A Health Economics Study on Diseases with TCM Advantages | 2022 | Liu TX |
| Not Acupuncture | Preparation and immune efficacy evaluation of Herpes zosterDNA vaccine and Rabies virus mRNA vaccine | 2024 | Liu J |
| Not Acupuncture | Meta-Analysis of Acupoint Injection in the Treatment of Postherpetic Neuralgia | 2021 | Lin ZY |
| Not Acupuncture | Epidemiological characteristics and disease burden of herpes zoster in Shandong Province: results based on health and medical big data | 2022 | Li ZW |
| **Excluded reasons** | **Title** | **Year** | **Author** |
| Not Acupuncture | Design and Synthesis of Novel Sodium Channel Blockers Containing α-Aminoamide Structures | 2016 | Li HT |
| Not Acupuncture | Analysis of the best evidence summary for nursing management of postherpetic neuralgia pain in the elderly | 2023 | Geng H, Yang ZL, Duan LZ, Cao XX, Liu SF, Yan ZL, et al. |
| Not Acupuncture | Efficacy and Safety of Injection in Jiaji Acupoints with Corticosteroids for Preventing Post Herpetic Neuralgia in Adults Aged More Than 50 Years:A Meta-analysis | 2016 | Tang T, Bu HE, Jia M, Xi YG, Xu SM, Li L, et al. |
| Not Acupuncture | Systematic review of the therapeutic effect of Jiaji points injection on postherpetic neuralgia caused by herpes zoster | 2023 | Lin XF, Tao K, Zhang GL, Shen YX, Dong CL, Zhang YS, et al. |
| Not Acupuncture | Based on complex network method, evaluation of the efficacy and prescription patterns of heat-clearing Chinese herbs in the treatment of acute herpes zoster | 2022 | Huang HM |
| Not Acupuncture | Clinical effect evaluation of high energy infrared analgesic instrument in treating postherpetic neuralgia | 2022 | Hu X |
| Not Acupuncture | LPHP/PHILOS for the Treatment of Proximal Humeral Fractures in Adults: A Systematic Review | 2009 | Hu JJ |
| Not Acupuncture | Study on Brain Functional Connectivity Density in Patients with Herpes Zoster and Postherpetic Neuralgia Based on Resting-State Functional Magnetic Resonance Imaging | 2022 | Hou XY |
| **Excluded reasons** | **Title** | **Year** | **Author** |
| Not Acupuncture | Strategy on Prevention and Treatment of Chemotherapy-induced Peripheral Neuropathy And Investigation of Its' Related Cytokines In Multiple Myeloma | 2016 | Han XY |
| Not Acupuncture | Evaluation of the Effect of Paravertebral Injection With Adriamycin and the Measurement of Area by Software in Treating the PHN | 2007 | Han T |
| Not Acupuncture | Age-related myelinopathy in the somatosensory systemand its implications in development of elderly pain | 2014 | Fu H |
| Not Acupuncture | Visualizable Podocyte-Targeting and Focused Ultrasound-Responsive Glucocorticoid Nano-Delivery System for Immune-Related Nephropathy | 2021 | Fan K |
| Not Acupuncture | The role of Tfh cells in the pathogenesis of primary membranous nephropathy and the regulation of Tfh by SQ | 2023 | Deng L |
| Not Acupuncture | Meta-analysis of risk factors for postherpetic neuralgia | 2022 | ALA'A SUWAIT DEEB AL SUWAIT |
| Not Acupuncture | Chinese medicine literature evaluation of treatment of herpes zoster | 2009 | Chen YL |
| Not PHN | Characteristics of clinical application of electroacupuncture therapy for peripheral neuropathy based on data mining | 2021 | Zhang ZD, Wang RQ, Liu JX, Li XF, Zhang X, Du YZ, et al. |
| Not PHN | Systematic review and sequential analysis on treatment of herpes zoster pain mainly by fire needle therapy | 2019 | Wang JX, Zhao WX, Zeng JC, Liu K, Li QJ, She YL, et al. |
| Not PHN | Acupuncture and Cutaneous Medicine: Is It Effective? | 2017 | Van Den Berg-Wolf M, Burgoon T |
| Not PHN | Clinical Efficacy and Safety of Acupuncture in the Treatment of Herpes Zoster: Meta-analysis | 2020 | Han S, Zhong C, Tian G, Shang H |
| **Excluded reasons** | **Title** | **Year** | **Author** |
| Not PHN | Comparison of efficacy of acupuncture-related therapy in the treatment of herpes zoster: A network meta-analysis of randomized controlled trials | 2023 | Zhang J, Mou Q, Wang Z, Huang J, Zhang Y, Li F |
| Not PHN | Cupping for Treating Pain: A Systematic Review | 2011 | Kim J-I, Lee MS, Lee D-H, Boddy K, Ernst E |
| Not PHN | Cupping therapy versus acupuncture for pain-related conditions: A systematic review of randomized controlled trials and trial sequential analysis | 2017 | Zhang YJ, Cao HJ, Li XL, Yang XY, Lai BY, Yang GY, et al. |
| Not PHN | Different moxibustion methods for herpes zoster: A systematic review and Meta-analysis | 2017 | Quan X, Li S, Ma H, Chen X |
| Not PHN | Efficacy and Safety of Electroacupuncture for Pain Control in Herpes Zoster: A Systematic Review and Meta-Analysis | 2022 | He K, Ni F, Huang Y, Zheng M, Yu H, Han D, et al. |
| Not PHN | Efficacy and Safety of Pricking-cupping Bloodletting Method for Herpes Zoster: A Systematic Review and Meta-analysis of Randomized Controlled Trials | 2022 | Zeng J, Lu L, Lu L, Tang C, Xu N, Lin G |
| Not PHN | Efficacy and safety of therapies related to acupuncture for acute herpes zoster: A PRISMA systematic review and network meta-analysis | 2024 | Liang X, Chen X, Li X, Yang S, Wang S, Ma D, et al. |
| Not PHN | Efficacy of Acupuncture for Herpes Zoster: A Systematic Review and Meta-Analysis | 2021 | Cui Y, Wang F, Li H, Zhang X, Zhao X, Wang D |
| **Excluded reasons** | **Title** | **Year** | **Author** |
| Not PHN | Efficacy of electroacupuncture on clinical signs and immunological factors in herpes zoster: The first systematic review, meta-analysis, and trial sequential analysis of randomized clinical trials | 2025 | Zhou Q, Jing M, Ren H, Li G, Wang Z |
| Not PHN | Evaluating the Evidence Quality Supporting the Role of Acupuncture for Herpes Zoster Pain：An Umbrella Review of Systematic Reviews and Meta-analyses | 2022 | Li J, Liu K, Ruan W, Lin G |
| Not PHN | External Therapy of Chinese Medicine for Herpes Zoster: A Systematic Review and Meta-Analysis | 2022 | Wu L, Chen Y, Man T, Jin L, Xu Z, Lv L, et al. |
| Not PHN | Global trends of acupuncture clinical research on analgesia from 2010 to 2023: a bibliometric and visualization analysis | 2024 | Li Z-Q, Wang X-F, Feng C, Fei Y-T, Liu J-P |
| Not PHN | Is fire needle superior to Western medication for herpes zoster? A systematic review and meta-analysis | 2019 | Li D, Mo ZM, Zhang RW, Chang MM, Yang BB, Tang SJ |
| Not PHN | Research trends of acupuncture therapy for painful peripheral nervous system diseases from 2004 to 2023: a bibliometric and meta-analysis | 2025 | Fan B, Xia Y, Feng Y, Yang X, Lin P, Fang J, et al. |
| Not PHN | Review of the evidence for the clinical efficacy of human acupuncture | 2001 | Ramey DW, Sampson W |
| Not PHN | Systematic review and meta-analysis: the effectiveness and safety of acupuncture in the treatment of herpes zoster | 2022 | Qi T, Lan H, Zhong C, Zhang R, Zhang H, Zhu F, et al. |
| Not PHN | The Effectiveness of Acupuncture for Herpes Zoster: A Systematic Review and Meta-Analysis | 2023 | Choi S-K, Moon J-H, Jang W-S, Jang J-E, Park S-H, Sung W-S, et al. |
| Not PHN | The Role of Acupuncture in Reducing Pain Scale Scoring in Geriatric Patients with Acute Pain: A Literature Review | 2022 | Harja KP, Roosheroe AG, Simadibrata CL, Helianthi DR |
| **Excluded reasons** | **Title** | **Year** | **Author** |
| Not PHN | Update evidence of effectiveness on pain relieving of cupping therapy: a systematic review and Meta-analysis of randomized controlled trials | 2025 | Wang Y, Dong S, Li B, Han M, Cao H |
| Not PHN | Wet cupping therapy for treatment of herpes zoster: a systematic review of randomized controlled trials | 2010 | Cao H, Zhu C, Liu J |
| Not PHN | Clinical Study on the Therapy of fire-needle affecting CD4, CD4, CD8, CD4/CD8, IL-6 in acute phases of Herpes Zoster | 2012 | Zhong ZM |
| Not PHN | Systematic Assessment of Randomized Controlled Trials of Acupuncture-moxibustion Treatment of Herpes Zoster | 2007 | Zhao T, Wang YH |
| Not PHN | Meta-analysis and systematic evaluation of the curative effect and analgesic effect of acupuncture on herpes zoster | 2021 | Xie H, Peng YJ, Wu KR, Jiang HB, Jiang XZ |
| Not PHN | Clinical efficacy and safety of acupuncture in the treatment of herpes zoster:A system review and meta-analysis | 2022 | Liu TX, Yue MK, Xia Y, Zhou LR |
| Not PHN | Clinical Efficacy and Safety of Acupuncture in the Treatment of Herpes Zoster: Meta-analysis | 2020 | Han SJ, Zhong CM, Shang HC, Tian GH |
| Not PHN | Meta-analysis and GRADE Evaluation of Acupuncture Combined with Bloodletting Puncture and Cupping Therapy in the Treatment of Herpes Zoster | 2022 | Lin SX, Lu CJ, Yuan JY, Zhu YX, Pi M |
| Not PHN | Network-meta Analysis and Health Economics Evaluation of Acupuncture and Moxibustion for Peripheral Neuropathic Pain | 2019 | Zhao WX |
| Not PHN | Clinical Systematic Review on Treatment of Herpes Zoster with Acupuncture Combined with Blood-Letting Puncture and Cupping | 2021 | Zhang LY |
| **Excluded reasons** | **Title** | **Year** | **Author** |
| Not PHN | Clinical observation of fire needle combined with cupping treatment of herpes zoster of hepatobiliary damp heat type | 2015 | Yuan J |
| Not PHN | Systematic evaluation of acute herpes zoster treatment with fire needle therapy mainly | 2023 | Chu XQ, Liu HM, Guo YF, Gao N, Zhang PC, Sun YX |
| Not PHN | Clinical observation on 60 cases of eye acupuncture and "encircling acupuncture" combined with semiconductor laser in treatment of herpes zoster | 2013 | Yang Y |
| Not PHN | Meta-Analysis of the Efficacy of Electroacupuncture in the Treatment of Herpes Zoster | 2019 | Xu JC, Zeng JC, Luo ZK, Pei WY, Chen SY, Lin GH |
| Not PHN | Based on the Literature of Modern Chinese Acupuncture for Disease Research – Nervous System Diseases | 2011 | Xing L |
| Not PHN | Methodological Evaluation of Acupuncture Treatment for Herpes Zoster | 2008 | Xie MZ |
| Not PHN | Clinical Study on Medicated Thread Moxibustion for Acute Herpes Zoster with Liver Meridian Heat Stagnation Pattern | 2017 | Quan XH |
| Not PHN | The Literature Study Of Cupping therapy on Advantage Diseases | 2011 | Meng XY |
| Not PHN | Systematic evaluation of puncture and cupping therapy for acute herpes zoster | 2023 | Mao S |
| Not PHN | Non-inferiority Clinical Study of Yang's Medicinal Thread Moxibustion in the Treatment of Acute Herpes Zoster with Stagnated Heat of the Liver Meridians | 2024 | Liang XY |
| **Excluded reasons** | **Title** | **Year** | **Author** |
| Not PHN | A Multicenter Randomized Controlled Trial of Acupuncture and Moxibustion for Herpes Zoster | 2011 | Li XW |
| Not PHN | Observation on the Therapeutic Effect of Deep Acupuncture at Jiaji Points Combined with Cotton-Pad Moxibustion for 30 Cases of Acute Herpes Zoster | 2018 | Li S, Fu Q, Yuan JH, Bao YH |
| Not PHN | Clinical study on the treatment of acute herpes zoster with fire needle and cupping therapy | 2020 | Li QJ |
| Not PHN | Meta Analysis of Clinical Randomized Controlled Trial about Jiaji Points on Herpes Zoster | 2009 | Fu L, Gao C |
| Not PHN | Investigation for the Clinical Disease Spectrum Of Bee Acupuncture and Meta-analysis based on literature | 2019 | CHAN Ming Wai Cindy |
| Not PHN | Research map analysis of cupping therapy based on CiteSpace in the treatment of herpes zoster | 2023 | Hu BH, Cheng T, Lin C |
| Not PHN | Systematic review and sequential analysis on treatment of herpes zoster pain mainly by fire needle therapy | 2019 | Wang JX, Zhao WX, Zeng JC, Liu K, Li QJ, She YL, et al. |
| Not PHN | Systematic Review of Randomized Controlled Trials on Fire Needle-Based Treatment for Herpes Zoster | 2009 | Wang JH, Chen HP, Chen J |
| Not PHN | Meta-analysis of Randomized Controlled Trials for Herpes Zoster Mainly Treated with Fire Needle Therapy | 2019 | Wang WX, Rong LY, Lin GH, Zhang XY |
| Not PHN | Systematic Review and Meta-Analysis of Fire Needle versus Western Medicine for Treating Herpes Zoster | 2019 | Li D, Mo ZM, Zhang RW, Chang MM, Yang BB, Tang SJ |
| **Excluded reasons** | **Title** | **Year** | **Author** |
| Not PHN | Randomized Controlled Trial of Large-dose Moxibustion ,Blood-letting Puncture and Cupping Combined with Electroacupuncture for Zoster-Associated Pain | 2023 | Huang SJ |
| Not PHN | Evidence-Based Medicine Research and Meta-Analysis of Different Acupuncture Methods for Treating Herpes Zoster | 2011 | Huang GF, Yang JM |
| Not PHN | Study of the Disease Menu and Analysis of Hotspots About Fire Needle Therapy on Modern Clinical Literature | 2017 | Hu QL |
| Not PHN | Overview Analysis of Clinical Research on Warm-Needle Therapy | 2016 | Hong J, Liu J, Zhang CH, Huang QF, Huang Y |
| Not PHN | Meta-Analysis of Randomized Controlled Trials on Filiform Fire Needle-Based Treatment for Herpes Zoster | 2019 | Shi QY, Ding DM |
| Not PHN | Meta-Analysis of Effect of Filiform Heated Needle on Pain Improvement and Herpes Prognosis in Patients with Herpes Zoster | 2020 | Shang XY, Deng KF, Lei CY, Yuan Y, Zhang SB, Li SX, et al. |
| Not PHN | Visual Analysis of Bloodletting Therapy Against Herpes Zoster | 2023 | Li Q, Shi JJ, Du HS, Qi YS |
| Not PHN | Systematic review on comparison of efficacy and safety between electroacupuncture at Jiaji pointsand single western medicine treatment for herpes zoster | 2020 | Yin ZH, Zhang QY, Xu GX, Fu YN, Chen J, Zhao L, et al. |
| Not PHN | A meta-analysis of randomized controlled trials of acupuncture bloodletting for shingles | 2020 | Lin L, Yan XN, Li WB, Zhao YD |
| Not PHN | Systematic Review and Meta-analysis on Efficacy and Safety of BloodLetting Puncture and Cupping Therapy for Acute Herpes Zoster | 2021 | Geng L, Feng GY, Wang S, Wang P |
| Not PHN | Efficacy and Safety of Pricking-cupping Bloodletting Method for Herpes Zoster: A Systematic Review and Meta-analysis of Randomized Controlled Trials | 2022 | Zeng JC, Lu LH, Lu LM, Tang CZ, Xu NG, Lin GH |
| Not PHN | Comparison of the Therapeutic Effect of Traditional Chinese Medicine and Western Medicine Antiviral Treatment on Herpes Zoster | 2021 | Huang GZ, Wang L, Wu JX, Wu B, Deng J, Huang XJ |
| Not PHN | Electroacupuncture at Jiaji Point for Analgesic Effect of Herpes Zoster and Its Influence on Serum C3, C4 | 2018 | Cheng L |
| Not PHN | The study of Optimization and clinical study on the treatment of herpes zoster with acupuncture and moxibustion by Network-meta | 2017 | Zeng JC |
| Not PHN | Clinical Evaluation Study on Fire Needle Combined with Cupping for Herpes Zoster | 2011 | Cao ZY |
| Not PHN | Evidence-Based Medicine Research on the Efficacy of Different Acupuncture Methods for Herpes Zoster | 2011 | Huang GF, Yang JM |
| Not PHN | Different moxibustion methods for herpes zoster: A systematic review and Meta-analysis | 2017 | Quan XH, Li SQ, Ma H, Chen XH |
| Not SR/Meta-Analysis | Clinical Study on The PostherPetic Neuralgia with Round Acupuncture and its effect on IL-6 | 2013 | Zhang C |
| Not SR/Meta-Analysis | The study of Electroacupuncture on the clinical efficiency and motor cortical excitability mechanism for Postherpetic Neuralgia | 2020 | Yang YL |
| Not SR/Meta-Analysis | Observation on the Therapeutic Effect of Abdominal Acupuncture Combined with Floating Needle for Postherpetic Neuralgia | 2006 | Ji CM, Fu LY |
| Not SR/Meta-Analysis | Literature Analysis of Acupuncture for Postherpetic Neuralgia | 2012 | Chen B |
| **Excluded reasons** | **Title** | **Year** | **Author** |
| Both acute and postherpetic stage are included | A bibliometric analysis and visualization of acupuncture and moxibustion therapy for herpes zoster and postherpetic neuralgia | 2024 | Chen J, Luo C, Ju P, Tu S, Shi S, Wang Z, et al. |
| Both acute and postherpetic stage are included | Acupuncture and moxibustion combined with cupping for the treatment of post-herpetic neuralgia: A meta-analysis | 2021 | Zhou Q, Wei S, Zhu H, Hu Y, Liu Y, Yang H, et al. |
| Both acute and postherpetic stage are included | Moxibustion for Herpes Zoster and Postherpetic Neuralgia: A Meta-Analysis | 2021 | Huang Y, Wu J, Cheng H, Liu Y |
| Both acute and postherpetic stage are included | Quality Evaluation of Randomized Controlled Trials on Chinese Medicine in the Treatment of HIV/AIDS-associated Herpes Zoster and Postherpetic Neuralgia | 2022 | Jiang Y, Yu ZY, Zheng RX, Lan HD, Qiao SY, Han M, et al. |
| Both acute and postherpetic stage are included | Evidence-Based Evaluation of Traditional Chinese Medicine for AIDS-Related Herpes Zoster and a Case-Control Study on All-Cause Mortality in AIDS | 2022 | Jiang Y |
| Both acute and postherpetic stage are included | Evaluation of Efficacy and Safety of Filiform Fire Needle-Based Treatment for Herpes Zoster and Postherpetic Neuralgia | 2013 | Haung SX |
| Overview of SR/Meta-Analysis | Acupuncture Treatment of Herpes Zoster And Postherpetic Neuralgia:An Overview of Systematic Reviews | 2020 | Yin Z, Xu G, Yang H, Fu Y, Hong X, Chen J, et al. |
| Overview of SR/Meta-Analysis | Assessing the reporting quality in randomized controlled trials of acupuncture for postherpetic neuralgia using the CONSORT statement and STRICTA guidelines | 2019 | Liu K, Zeng J, Pei W, Chen S, Luo Z, Lu L, et al. |
| Overview of SR/Meta-Analysis | Different Acupuncture Therapies for Postherpetic Neuralgia: An Overview of Systematic Reviews and Meta-analysis | 2025 | Xia YF, Sun RH, Li SM, Wang YY, Li RR, Fang JQ |
| **Excluded reasons** | **Title** | **Year** | **Author** |
| Overview of SR/Meta-Analysis | Overview of Systematic Reviews of Acupuncture for Postherpetic Neuralgia | 2021 | Yang T, Xiao L, Li YK |

**Supplementary Table 2: Amstar-2 assessment of included SRs**

| **Study ID** | **1** | **2** | **3** | **4** | **5** | **6** | **7** | **8** | **9** | **10** | **11** | **12** | **13** | **14** | **15** | **16** | **AMSTAR-2** |
| --- | --- | --- | --- | --- | --- | --- | --- | --- | --- | --- | --- | --- | --- | --- | --- | --- | --- |
| Wang, Y.(2018)1 | Y | PY | N | Y | N | Y | Y | Y | Y | Y | Y | Y | Y | Y | N | Y | Low |
| Yang, J.(2023)2 | Y | N | N | PY | Y | Y | N | N | Y | Y | Y | N | Y | Y | N | Y | Critically low |
| Yang, Y.(2024)3 | Y | N | N | PY | Y | N | N | Y | Y | Y | Y | Y | Y | Y | Y | Y | Critically low |
| Wang, H.(2022)4 | Y | Y | N | PY | Y | Y | N | Y | Y | N | Y | Y | Y | Y | Y | Y | Low |
| Kui, W.(2024)5 | Y | Y | N | PY | Y | Y | N | Y | Y | Y | Y | Y | Y | Y | Y | N | Low |
| Wu, Q.(2021)6 | Y | Y | N | PY | Y | Y | N | Y | Y | Y | Y | Y | Y | Y | Y | Y | Low |
| Cui, Y.(2023)7 | Y | Y | N | Y | Y | Y | N | Y | Y | Y | Y | N | Y | Y | Y | Y | Low |
| Pei, W.(2019)8 | Y | Y | N | PY | Y | Y | N | Y | Y | N | Y | Y | Y | Y | Y | Y | Low |
| Zhang, B.(2023)9 | Y | N | N | PY | Y | Y | N | Y | Y | Y | Y | N | N | N | Y | N | Critically low |
| Li, X.(2023)10 | Y | N | N | PY | Y | N | N | Y | Y | Y | Y | Y | Y | N | Y | Y | Critically low |
| Hong, W.(2023)11 | Y | N | N | PY | Y | Y | N | Y | Y | Y | Y | N | Y | N | Y | N | Critically low |
| Guo, C.(2023)12 | Y | N | N | PY | Y | Y | N | Y | Y | N | Y | N | N | Y | Y | N | Critically low |
| Gao, J.(2023)13 | Y | N | N | PY | Y | Y | N | Y | Y | Y | Y | N | Y | Y | Y | N | Critically low |
| Chen, S.(2023)14 | Y | N | N | PY | Y | Y | N | Y | Y | Y | Y | N | Y | N | Y | N | Critically low |
| **Study ID** | **1** | **2** | **3** | **4** | **5** | **6** | **7** | **8** | **9** | **10** | **11** | **12** | **13** | **14** | **15** | **16** | **AMSTAR-2** |
| Yang, J.(2022)15 | Y | N | N | PY | Y | Y | N | Y | Y | N | Y | Y | Y | Y | Y | N | Critically low |
| Qian, X.(2022)16 | Y | N | N | PY | Y | Y | N | N | Y | Y | Y | Y | Y | N | Y | N | Critically low |
| Jiang, Y.(2022)17 | Y | N | N | PY | N | N | N | N | Y | N | Y | Y | Y | Y | Y | N | Critically low |
| Huang, S.(2022)18 | Y | N | N | PY | Y | Y | N | Y | Y | Y | Y | N | Y | N | Y | N | Critically low |
| Huang, R.(2022)19 | N | N | N | PY | Y | Y | N | Y | Y | Y | Y | N | Y | N | N | N | Critically low |
| Hu, C.(2022)20 | Y | N | N | PY | Y | N | N | Y | Y | Y | Y | N | Y | N | Y | N | Critically low |
| Bian, Z.(2022)21 | Y | N | N | PY | Y | Y | N | Y | Y | N | Y | N | Y | N | Y | N | Critically low |
| Tang, X.(2021)22 | Y | N | N | PY | N | Y | N | Y | Y | N | Y | N | Y | Y | Y | N | Critically low |
| Li, Z.(2021)23 | N | N | N | PY | Y | Y | N | Y | Y | N | Y | N | Y | N | N | N | Critically low |
| Jiang, C.(2021)24 | Y | N | N | PY | Y | Y | N | Y | Y | Y | Y | Y | Y | Y | Y | N | Critically low |
| Liu, Y.(2020)25 | Y | N | N | PY | Y | Y | N | Y | Y | Y | Y | N | Y | Y | N | N | Critically low |
| Zha, Q.(2020)26 | N | N | N | PY | Y | N | N | Y | Y | N | Y | N | Y | N | Y | N | Critically low |
| Wu, P.(2019)27 | N | N | N | PY | Y | N | N | Y | Y | N | Y | Y | Y | Y | Y | N | Critically low |
| Wu, Y.(2018)28 | Y | N | N | PY | Y | N | N | Y | Y | N | Y | N | Y | Y | N | N | Critically low |
| Dong, Q.(2017)29 | N | N | N | PY | Y | N | N | Y | Y | N | Y | N | Y | N | N | N | Critically low |
| **Study ID** | **1** | **2** | **3** | **4** | **5** | **6** | **7** | **8** | **9** | **10** | **11** | **12** | **13** | **14** | **15** | **16** | **AMSTAR-2** |
| Zhang, X.(2016)30 | N | N | N | PY | N | N | N | Y | Y | N | N | N | N | N | Y | N | Critically low |
| Deng, R.(2016)31 | N | N | N | PY | Y | N | N | Y | Y | Y | Y | N | Y | N | N | N | Critically low |
| Xie, F.(2015)32 | N | N | N | PY | N | N | N | Y | Y | N | Y | N | Y | Y | Y | N | Critically low |
| Ou, D.(2015)33 | Y | N | N | PY | Y | Y | N | Y | Y | N | Y | N | Y | Y | Y | N | Critically low |
| Li, W.(2015)34 | Y | N | N | PY | Y | Y | N | Y | Y | N | Y | Y | Y | Y | Y | N | Critically low |
| Yuan, L.(2014)35 | Y | N | N | PY | Y | Y | N | Y | Y | N | Y | N | Y | N | Y | N | Critically low |
| Zhu, Y.(2011)36 | Y | N | N | PY | N | Y | N | Y | Y | N | Y | N | Y | N | Y | N | Critically low |
| Wei, Y.(2011)37 | Y | N | N | PY | N | Y | N | Y | Y | N | Y | N | Y | N | N | N | Critically low |
| Mao, M.(2008)38 | Y | N | N | PY | Y | Y | N | Y | Y | N | N | N | N | N | N | N | Critically low |
| Zhou, D.(2022)39 | Y | N | N | PY | Y | Y | N | Y | Y | Y | Y | N | N | Y | Y | N | Critically low |
| Shi, J.(2023)40 | Y | N | N | PY | N | N | N | Y | Y | N | Y | Y | Y | Y | Y | N | Critically low |

Each question was answered with “Y”: Yes; “PY”: partial yes; or “N”: no. Questions: 1. PICO component? 2. Methods pre-set? Deviations justified? 3. Study designs explained? 4. Comprehensive search conducted? 5. Performed study selection duplicated? 6. Performed data extraction duplicated? 7. Exclusions listed & justified? 8. Studies described in detail? 9. The risk of bias (RoB) assessed satisfactorily? 10. Funding sources reported? 11. Meta-analysis methods appropriate? 12. RoB impact on meta-analysis assessed? 13. RoB considered in results? 14. Heterogeneity explained & discussed? 15. Publication bias investigated? 16. Conflicts of interest reported, including funding? The overall confidence of each SR was graded as “high”, “moderate”, “low” or “critically low”.

**References**

1. Wang Y, Li W, Peng W, Zhou J, Liu Z. Acupuncture for postherpetic neuralgia: Systematic review and meta-analysis. *Medicine (Baltimore)* 2018; 97(34): e11986.

2. Yang JW, Hu XY, Xiu WC, Tian ZY, Gang WJ, Jing XH. Acupuncture for the pain of postherpetic neuralgia: A scoping review. *World Journal of Acupuncture - Moxibustion* 2023; 33(4): 358-66.

3. Yang Y, Xu W, Li M, Zhou Y, Qian Y. Collateral-Pricking and Bloodletting Cupping Combined with Electroacupuncture for Postherpetic Neuralgia: A Meta-Analysis. *Altern Ther Health Med* 2024; 30(11): 290-6.

4. Wang H, Wan R, Chen S, Qin H, Cao W, Sun L, Shi Y, Zheng Q, Li Y. Comparison of Efficacy of Acupuncture-Related Therapy in the Treatment of Postherpetic Neuralgia: A Network Meta-Analysis of Randomized Controlled Trials. *Evid Based Complement Alternat Med* 2022; 2022: 3975389.

5. Kui W, Xie L, Li Y, Gu Z, Liu S, Xue C, Wang K. Efficacy and safety of bloodletting puncture and cupping in postherpetic neuralgia: A systematic review and meta-analysis. *Biomedical Reports* 2024; 20(2).

6. Wu Q, Hu H, Han D, Gao H. Efficacy and Safety of Moxibustion for Postherpetic Neuralgia: A Systematic Review and Meta-Analysis. *Frontiers in Neurology* 2021; 12.

7. Cui Y, Zhou X, Li Q, Wang D, Zhu J, Zeng X, Han Q, Yang R, Xu S, Zhang D, Meng X, Zhang S, Sun Z, Yin H. Efficacy of different acupuncture therapies on postherpetic neuralgia: A Bayesian network meta-analysis. *Front Neurosci* 2022; 16: 1056102.

8. Pei W, Zeng J, Lu L, Lin G, Ruan J. Is acupuncture an effective postherpetic neuralgia treatment? A systematic review and meta-analysis. *J Pain Res* 2019; 12: 2155-65.

9. Zhang B, Yin LW, Zhu HH, Yang RF, Huang YX, Chen QQ, Zhu XQ, Zhang ZT, Li ZM, Zhuang LX. Meta-analysis of Fu's Subcutaneous Needling in the Treatment of Postherpetic Neuralgia. *Journal of Guangzhou University of Traditional Chinese Medicine* 2023; 40(08): 2108-17.

10. Li XJ, Wang Z, Han QY, Chen SZ, Wan HM. Different Acupuncture Methods for the Treatment of Postherpetic Neuralgia: A Network Meta-analysis. *World Chinese Medicine* 2023; 18(19): 2752-7.

11. Hong WY, Jiang GH, Liu BQ. Meta-analysis and Trial Sequential Analysis of Randomized Controlled Trials of Fu's Subcutaneous Needling for Postherpetic Neuralgia. *Journal of Guangzhou University of Traditional Chinese Medicine* 2023; 40(01): 261-70.

12. Guo CQ. Clinical study and network Meta-analysis of acupuncture treatment for postherpetic neuralgia: Tianjin University of Traditional Chinese Medicine; 2023.

13. Gao JY, Lu CJ, Yuan JJ, Zhu YX, Shen Y, Wang CY, Pi M. The Efficacy and Safety of Fire Needling in the Treatment of Postherpetic Neuralgia: A Meta-analysis. *Journal of Guangzhou University of Traditional Chinese Medicine* 2023; 40(09): 2403-10.

14. Chen SY, Li XJ, Liu YW, Liu ZY. A Meta-analysis of efficacy and safety of treating post herpetic neuralgia by percussopunctator. *Clinical Journal of Chinese Medicine* 2023; 15(35): 73-8.

15. Yang JW. Study of Influency Factors of Clinical Efficacy of Acupuncture and Moxibustion in the Treatment of Postherpetic Neuraglia: China Academy of Chinese Medical Sciences; 2022.

16. Qian X, Liu TF, Yuan AH. Meta-analysis on Acupuncture and Moxibustion in the Treatment of Postherpetic Neuralgia. *Guangming Journal of Chinese Medicine* 2022; 37(07): 1241-5.

17. Jiang YH, Li YF, Fan BF. Traditional Chinese Medicine External Treatments for Postherpetic Neuralgia: a Network Meta-analysis. *Journal of China-Japan Friendship Hospital* 2022; 36(02): 109-11.

18. Huang SQ, Xiong J, Xiang J, Hua FH, Xiao Y, Yan LK. Efficacy and safety of fire needle for post-herpetic neuralgia: a systematic review. *Chinese Journal of Evidence-Based Medicine* 2022; 22(02): 168-75.

19. Huang R, Dong ZW, Yan CC. Systematic assessment and meta-analysis on acupuncture for postherpetic neuralgia. *China Medicine and Pharmacy* 2022; 12(24): 32-6.

20. Hu CX, Lin BC, Li ZX, Chen XZ, Xu NG. Systematic Review and Meta-analysis of Single Acupuncture Therapy for Postherpetic Neuralgia. *Journal of Guangzhou University of Traditional Chinese Medicine* 2022; 39(11): 2709-17.

21. Bian ZY. Acupuncture therapy for postherpetic neuralgia: a network Meta-analysis [master]: Zhejiang Chinese Medical University; 2022.

22. Tang X, Chen XL, Xu DT, Tong HC. Meta Analysis of the Efficacy of Fire Needle Therapy in the Treatment of Postherpetic Neuralgia. *World Latest Medicine Information* 2021; 21(12): 268-9,71.

23. Li Z. The Effect of Absorbable Suture Floating Implantation on Postherpetic Neuralgia and and its influence on Treg and Th17: Guangzhou University of Chinese Medicine; 2021.

24. Jiang CXJ, Sun ZR, Yin HN. Meta-analysis of the Efficacy and Safety of Acupuncture in the Treatment of Postherpetic Neuralgia. *Journal of Emergency in Traditional Chinese Medicine* 2021; 30(12): 2083-9.

25. Liu YJ, Zhang QA, Wu YY, Shi Y, Fang JQ, Han DX. Meta-analysis for Efficacy and Safety of Electroacupuncture in Treating Postherpetic Neuralgia. *Journal of Guangzhou University of Traditional Chinese Medicine* 2020; 37(12): 2472-80.

26. Zha QP, Du YH, Li J, Zhang JJ, Chen LL. A Meta-analysis of Acupuncture and Drugs in the Treatment of Postherpetic Neuralgia. *World Latest Medicine Information* 2020; 20(78): 11-5.

27. Wu PP. Literature analysis and regularity of acupuncture in the treatment of postherpetic neuralgia: Liaoning University of Traditional Chinese Medicine; 2019.

28. Wu YJ. Meta analysis of the curative effect of Warm Acupuncture Moxibustion in the treatment of Post-herpetic Neuralgia (PHN): Guangzhou University of Chinese Medicine; 2018.

29. Dong Q. Meta Analysis of the Efficacy of Acupuncture and Drug Therapy for Postherpetic Neuralgia. *Journal of Liaoning University of Traditional Chinese Medicine* 2017; 19(11): 179-82.

30. Zhang X, Li JX. Literature of Clinical Randomised Controlled Trials of Acupuncture for Postherpetic Neuralgia: a Meta-analysis. Proceedings of the 2016 Annual Academic Conference of Hunan Provincial Acupuncture and Moxibustion Society; 2016. p. 223-7.

31. Deng RY, Chen RX, Xiong J, Zhao W. System evaluation and Meta-analysis of moxibustion on post-herpetic neuralgina. *China Journal of Traditional Chinese Medicine and Pharmacy* 2016; 31(12): 5329-32.

32. Xie FS. System evaluation of Acupuncture and Moxibustion treatment about postherpetic neuralgia: Guangzhou University of Chinese Medicine; 2015.

33. Ou DF, Zhou CE. System evaluation of RCT systematic about the treatment of postherpetic neuralgia by using fire needle. *Clinical Journal of Traditional Chinese Medicine* 2015; 27(01): 115-9.

34. Li W. Systematic Evaluation and Meta-analysis of Acupuncture for Postherpetic Neuralgia: Beijing University of Chinese Medicine; 2015.

35. Yuan L. Acupuncture for postherpetic neuralgia: a systematic review and Meta-analysis: Chengdu University of Traditional Chinese Medicine; 2014.

36. Zhu Y, Zhu LT, Li N, Li Y, Jin HZ. Jiaji points combined with surrounding needling for the treatment of postherpetic neuralgia:A Meta-analysis. *Chinese Journal of Tissue Engineering Research* 2011; 15(11): 2064-8.

37. Wei YF, Gao SH. A systematic evaluation comparing the efficacy of acupuncture and western medicine in the treatment of postherpetic neuralgia. *Henan Traditional Chinese Medicine* 2011; 31(11): 1324-7.

38. Mao M. Clinical study on the treatment of postherpetic neuralgia by filiform-fire needle: Beijing University of Chinese Medicine; 2008.

39. Zhou DN, Qi FJ, Wang ZJ, Wang YC. Meta-analysis of Mainly Treated with Pricking Blood and Cupping in the Treatment of Postherpetic Neuralgia. *Journal of Liaoning University of Traditional Chinese Medicine* 2022; 24(08): 166-71.

40. Shi J. A Meta-analysis on the Treatment of Postherpetic Neuralgia by Pricking and Bleeding Therapy. *World Latest Medicine Information* 2023; 23(59): 76-86.
